# Supplementary material
Source: ML conference proceedings conference paper supplement (https://proceedings.neurips.cc/paper_files/paper/2019/hash/f04cd7399b2b0128970efb6d20b5c551-Abstract.html)
Supplement: Supplementary file [file f04cd7399b2b0128970efb6d20b5c551-Supplemental.zip]

---

# Supplementary Material

## Deep Scale-spaces: Equivariance Over Scale

---

Anonymous Author(s)

Affiliation

Address

email

### Abstract

1 In this supplementary material we elaborate on where the scale-space action comes  
2 from and the architectures used in our paper.

### 3 1 Scale-spaces

4 Here we provide some extra information on scale-spaces for the interested reader. For in depth  
5 literature, we suggest Florack et al. [1994, 1992], Pauwels et al. [1995], Lindeberg [1990, 1997],  
6 Crowley et al. [2002], Salden et al. [1998], Duits et al. [2004, 2003], Duits and Burgeth [2007],  
7 Burgeth et al. [2005a,b].

#### 8 1.1 1D Gaussian Scale-space

9 We are given an initial 1D signal  $f_0$  with intrinsic bandlimit, or *zero-scale*, defined by  $s_0$  i.e.,  
10 we impose a maximum frequency, such that there is a correspondence with discretized signals.  
11 Note that  $\sqrt{s_0}$  is inversely proportional to frequency content of the signal. We wish to downsize  
12 it isotropically by a factor  $a$ , which we call the *dilation*. For this we introduce the downsizing  
13 action  $L_a[f](x) = f(a^{-1}x)$  for  $a \leq 1$ . We model the bandlimit of the initial signal as the result of  
14 convolving some other signal  $f$  with a Gaussian of width  $s_0$ , so

$$f_0(x) = [G(\cdot, s_0) *_{\mathbb{R}^d} f](x). \quad (1)$$

15 Now the result of the downscaling action of  $f_0$  is as follows

$$L_a[f_0](x) = f_0(a^{-1}x) = \int_{\mathbb{R}^d} G(a^{-1}x - y, s_0) f(y) dy = \int_{\mathbb{R}^d} G(x - ay, a^2 s_0) f(y) a dy \quad (2)$$

$$= \int_{\mathbb{R}^d} G(x - z, a^2 s_0) f(a^{-1}z) dz = [G(\cdot, a^2 s_0) *_{\mathbb{R}^d} L_a[f]](x). \quad (3)$$

16 From the first to second lines we have performed a change of variables  $z = ay$ . So we see that the  
17 effect of downsizing a bandlimited signal by  $a$  shifts the bandlimit from  $s_0$  to  $a^2 s_0$ . Since  $a \leq 1$ , this  
18 means the blurring Gaussian is narrower and so the frequency content of the signal has been shifted  
19 higher. The key relation to bear in mind is the shift  $s_0 \mapsto a^2 s_0$ .

20 For a proper scaling, we want the result of the downscaling to have the *same bandlimit* as the original  
21 signal  $f_0$ . This is because if we are representing the signal on a discrete grid, then we have a physically  
22 defined maximum frequency content we can store, given by the pixel separation. The solution is to  
23 convolve the signal  $L_a[f_0]$  with a correcting Gaussian of width  $s_0 - a^2 s_0$ . Note that this is possible,  
24 since  $a \leq 1$ , so  $s_0 - a^2 s_0 > 0$ . Alternatively, we want to find a correcting Gaussian to blur before  
25 downsizing. Say this correcting Gaussian has bandlimit  $t$ , then we have

$$L_a[G(\cdot, t) * f_0] = L_a[G(\cdot, t + s_0) * f] = [G(\cdot, a^2(t + s_0)) * L_a[f]]. \quad (4)$$

26 But we also want the bandlimit of the downsampled signal to be  $s_0$ , so we have the relation

$$a^2(t + s_0) = s_0. \quad (5)$$

27 Thus a 1D Gaussian scale-space, parameterized by dilation, can be built by setting

$$f(t(a, s_0), x) = [G(\cdot, t(a, s_0)) * f_0](x), \quad t(a, s_0) := \frac{s_0}{a^2} - s_0 \quad (6)$$

$$f(0, x) = f_0(x) \quad (7)$$

## 28 1.2 ND Gaussian Scale-space

29 We now explore downscaling in  $N$ -dimensions. We first of all represent an initial image  $f_0$  as

$$f_0 = G(\cdot, \Sigma_0) *_{\mathbb{R}^d} f. \quad (8)$$

30 We use the Gaussian to represent the fact that  $f_0$  should have an intrinsic bandlimit, usually defined  
31 by the resolution at which it is sampled. Now let's introduce the affine action:

$$L_{A,z}[f](x) = f(A^{-1}(x - z)). \quad (9)$$

32 It simply applies an affine transformation to our signal. Now using a similar logic to in the 1D case,  
33 if we concatenate the affine action with bandlimiting we get

$$L_{A,z}[G(\cdot, \Sigma_0) *_{\mathbb{R}^d} f_0] = G(\cdot, A\Sigma_0A^\top) *_{\mathbb{R}^d} L_{A,z}[f_0]. \quad (10)$$

34 So we see that resizing a bandlimited signal shifts the bandlimit according to  $\Sigma_0 \mapsto A\Sigma_0A^\top$ . Since  
35 we would like to have the same bandlimit on our signal before and after the resizing (since we can  
36 only represent the signal at constant resolution), we introduce a second bandlimiting by convolving  
37 with a Gaussian of width  $\Sigma_0 - A\Sigma_0A^\top$ . To save space, we write  $G_\Sigma = G(\cdot, \Sigma)$ . So

$$G_{\Sigma_0} *_{\mathbb{R}^d} L_{A,z}[f] = G_{\Sigma_0 - A\Sigma_0A^\top} *_{\mathbb{R}^d} L_{A,z}[f_0] = L_{A,z}[G_{A^{-1}\Sigma_0A^{-\top} - \Sigma_0} *_{\mathbb{R}^d} f_0] \quad (11)$$

38 From the first to the second equality, we have exchanged the order of the Gaussian convolution and  
39 the affine action and altered the bandwidth from  $\Sigma_0 - A\Sigma_0A^\top$  to  $A^{-1}\Sigma_0A^{-\top} - \Sigma_0$ , which comes  
40 from the relation established in Equation 10. Thus the affine action for an affine scale-pyramid is  
41 defined as

$$L_{A,z}[G_{A^{-1}\Sigma_0A^{-\top} - \Sigma_0} *_{\mathbb{R}^d} f](x) = [G_A^{\Sigma_0} *_{\mathbb{R}^d} f](A^{-1}(x - z)) \quad (12)$$

42 where we have defined  $G_A^{\Sigma_0} = G_{A^{-1}\Sigma_0A^{-\top} - \Sigma_0}$ .

43 For what values of  $A$  and  $z$  is this action valid? Let's first focus on  $A$ . To maintain the zero-scale of  
44  $\Sigma_0$ , we had to convolve with a Gaussian of width  $\Delta = \Sigma_0 - A\Sigma_0A^\top$ . Now we know that covariance  
45 matrices have to be symmetric  $\Delta = \Delta^\top$  and positive definite  $\Delta \succ 0$ . We see already that it is  
46 symmetric, but it is not necessary positive definite. If the base bandlimit is of the form  $\Sigma_0 = \sigma_0^2 I$   
47 (the original image is isotropically bandlimited), then we can rearrange to

$$\Delta = \Sigma_0 - A\Sigma_0A^\top = (I - AA^\top)\Sigma_0 \succ 0 \quad (13)$$

48 This expression is only positive definite if  $I - AA^\top \succ 0$ ; that is

$$I \succ AA^\top. \quad (14)$$

49 This condition implies that  $A^\top$  is a contraction because

$$v^\top(I - AA^\top)v = \|v\|_2^2 - \|A^\top v\|_2^2 \geq 0 \implies \|v\|_2^2 \geq \|A^\top v\|_2^2, \quad \forall v \in \mathbb{R}^N. \quad (15)$$

50 Another way of phrasing this is the that the singular values of  $A$  may not exceed unity. Note that  
51 rotations do not break this constraint. So we see this model naturally aligns with our notion that  
52 we can only model image downscalings, and that upscalings are prohibited.

### 53 1.3 Other Scale-space variants

54 We have presented the Gaussian scale-space in  $ND$ , but there also exists a zoo of other scales-spaces.  
 55 The most prominent are: the  $\alpha$ -scale-spaces [Pauwels et al., 1995], the discrete Gaussian scale-spaces  
 56 [Lindeberg, 1990], and the binomial scale-spaces [Burt, 1981]. In the following, we give a brief  
 57 introduction to each, exhibited in 1D.

58  **$\alpha$ -scale-spaces**  $\alpha$ -scale-spaces Pauwels et al. [1995] are a generalization of the Gaussian space-space  
 59 in the continuous domain. They are easiest to understand by considering their form in Fourier-space.  
 60 We begin by considering the Fourier transform of the Gaussian space-space over the spatial dimension

$$\hat{f}(t, \omega) = \hat{G}(\omega, t) \cdot \hat{f}_0(\omega) \quad (16)$$

$$\hat{f}(0, \omega) = \hat{f}_0(\omega), \quad (17)$$

61 where  $\hat{f}$  is the Fourier transform of  $f$ . We are interested in finding a collection of filters like  $G$ , closed  
 62 under convolution. In the Fourier domain this corresponds to finding a collection of filters, like  $\hat{G}$   
 63 closed under multiplication. The Fourier transform of the Gauss-Weierstrass kernel is

$$G(x, t) = \frac{1}{(4\pi t)^{1/2}} \exp \left\{ -\frac{x^2}{4t} \right\} \xLeftrightarrow{\text{FT}} \hat{G}(\omega, t) = \exp \{ -\omega^2 t \}. \quad (18)$$

64 The collection  $\{\hat{G}(\omega, t)\}_{t>0}$  is indeed closed under multiplication and forms a semigroup. To form  
 65 the  $\alpha$ -scale-spaces we notice that the Fourier kernel

$$\hat{G}^\alpha(\omega, t) = \exp \{ -\omega^{2\alpha} t \} \quad (19)$$

66 is also closed under multiplication and defines a semigroup. The range of  $\alpha$  is typically taken to  
 67 be  $(0, 1]$ , to make sure that higher levels in the  $\alpha$ -scale-space are blurrier. Notice that for  $\alpha = 1$  we  
 68 return to the standard Gaussian scale-space.

69 **Binomial Scale-space** The binomial scale-space Crowley et al. [2002] is a discrete scale-space in  
 70 both the spatial and scale dimensions. It is generated by convolution in  $\mathbb{Z}$  with the binomial kernel

$$B(x, N) = {}^N C_x \bigg/ \sum_{x=0}^N {}^N C_x, \quad {}^N C_x = \frac{N!}{(N-x)!N!}, \quad (20)$$

71 where  $N > 0$  is the width of the kernel and  $0 \leq x \leq N$  is the spatial location of the filter tap. Thus  
 72 the scale-space is

$$f(N, x) = [B(\cdot, N) *_{\mathbb{Z}} f_0](x) \quad N > 0. \quad (21)$$

73 As  $N$  grows  $B(N, x)$  rapidly converges to a Gaussian kernel of variance  $\sigma^2 = N/4$ . The Binomial  
 74 filters are closed under convolution obeying the semigroup property

$$[B(\cdot, N) *_{\mathbb{Z}} B(\cdot, M)](x) = B(x, N + M - 1). \quad (22)$$

75 **Discrete Gaussian Scale-space** The discrete Gaussian scale-space Lindeberg [1990] is discrete in  
 76 the spatial dimension but continuous in the scale dimension, which makes it popular to work with in  
 77 many practical scale-spaces with non-integer dilation. The scale-space is generated by convolution in  
 78  $\mathbb{Z}$  with the discrete Gaussian kernel

$$G(x, t) = e^{-t} I_{|x|}(t), \quad I_x(t) = \sum_{m=0}^{\infty} \frac{(\frac{1}{2}x)^{2m+\alpha}}{m! \Gamma(m + \alpha + 1)} \quad (23)$$

79 where the term  $I_k(t)$  is a modified Bessel function of the first kind. These can be implemented easily  
 80 using `scipy.special.i0`. The scale-space is formed in the usual way as

$$f(t, x) = [G(\cdot, t) *_{\mathbb{Z}} f_0](x) \quad t > 0 \quad (24)$$

$$f(0, x) = f_0(x). \quad (25)$$

Table 1: A residual network. Input at the top. A horizontal line denotes spatial average pooling of stride 2, kernel size 2. Shape is displayed as [scale-space levels, height, width, channels out]. The no-res block denotes a residual block without the skip connection, i.e.  $y = \mathcal{F}(x)$ . Scale pooling denotes an averaging over all scale dimensions.

| Layer type          | Shape                 |
|---------------------|-----------------------|
| res[ $k, 3, 3$ ]    | [ $S, 992, 992, N$ ]  |
| res[ $k, 3, 3$ ]    | [ $S, 496, 496, 2N$ ] |
| res[ $1, 3, 3$ ]    | [ $S, 248, 248, 4N$ ] |
| res[ $k, 3, 3$ ]    | [ $S, 248, 248, 4N$ ] |
| res[ $1, 3, 3$ ]    | [ $S, 124, 124, 8N$ ] |
| res[ $1, 3, 3$ ]    | [ $S, 124, 124, 8N$ ] |
| res[ $1, 3, 3$ ]    | [ $S, 124, 124, 8N$ ] |
| res[ $k, 3, 3$ ]    | [ $S, 124, 124, 8N$ ] |
| no-res[ $k, 3, 3$ ] | [ $S, 124, 124, 8N$ ] |
| scale-pool          | [1, 124, 124, 8N]     |
| corr[1,1,1],        | [1, 124, 124, 19]     |
| bilinear upsample   | [1, 992, 992, 19]     |

## 2 Architectures In The Experiments

In the experiments, we use a DenseNet Huang et al. [2017] and a ResNet He et al. [2016]. The architectures are as follows. For the scale equivariant versions, we use 4 scales of a discrete Gaussian scale-space Lindeberg [1990].

**ResNet** The residual network consists of a concatenation of residual blocks. A single residual block implements the following

$$y = x + \mathcal{F}(x) \quad (26)$$

where on the RHS we refer to  $x$  as the skip connection and  $\mathcal{F}(x)$  as the residual connection. If  $x$  has fewer channels than  $\mathcal{F}(x)$ , then we pad the missing dimensions with zeros. Each residual connection uses a concatenation of two scale-equivariant correlation interleaved with batch normalization (BN) and a ReLU (ReLU) nonlinearity. These are composed as follows (input left, output right)

$$\text{corr}[1, 3, 3] - \text{BN} - \text{ReLU} - \text{corr}[k, 3, 3] - \text{BN}. \quad (27)$$

where  $\text{corr}[k, h, w]$  refers to a scale correlation with kernel size  $[k, h, w]$  and where  $k$  is the number of scale channels,  $h$  is the spatial height of the filter, and  $w$  is its spatial width. We denote the entire residual block as  $\text{res}[k, h, w]$ .

The model we use is given in Table 1. It follows the practice of Yu et al. [2017], who use a bilinear upsampling at the end of the network, since segmentations do not tend to contain high frequency details. In our experiments we use the models shown in Table 2

**DenseNet** The Dense network Huang et al. [2017] consists of a concatenation of 3 dense blocks. Each dense block is composed of layers of the form

$$y_{N+1} = \mathcal{H}([y_1, y_2, \dots, y_N]) \quad (28)$$

where  $[y_1, y_2, \dots, y_N]$  is the concatenation of all the previous layers' outputs. Each layer  $\mathcal{H}$  is the composition (input left, output right)

$$\text{BN} - \text{ReLU} - \text{corr}[k, 3, 3] \quad (29)$$

Table 2: We match model settings with their names from the paper. Settings are displayed as  $[k, S, N]$  or [kernels scale dim., num scales, number of channels].

| Model                            | Settings   |
|----------------------------------|------------|
| S-ResNet, multiscale interaction | [2, 4, 16] |
| S-ResNet no interaction          | [1, 4, 16] |
| ResNet, matched channels         | [1, 1, 16] |
| ResNet, matched parameters       | [1, 1, 18] |

Table 3: A DenseNet. Input at the top. For shape, we show the number of scales, the height, the width, and the number of channels.  $S$  denotes the number of scales used per layer.

| Layer type                               | Shape                |
|------------------------------------------|----------------------|
| dense <sub>12</sub> [1, 3, 3] $\times$ 3 | [ $S$ , 96, 96, 39]  |
| transition[3, 3, 3]                      | [ $S$ , 48, 48, 19]  |
| dense <sub>24</sub> [1, 3, 3] $\times$ 3 | [ $S$ , 48, 48, 94]  |
| transition[3, 3, 3]                      | [ $S$ , 24, 24, 47]  |
| dense <sub>48</sub> [1, 3, 3] $\times$ 3 | [ $S$ , 24, 24, 213] |
| Global average pooling                   | [1, 1, 213]          |
| Linear layer                             | [1, 1, 2]            |

where  $\text{corr}[k, 3, 3]$  was described in the previous section. We use the notation  $\text{dense}_C[k, h, w] \times N$  to denote a dense block with  $N$  layers and  $C$  output channels per layer. The number of channel outputs remains constant per layer within a dense block. Between dense blocks, we insert transition layer which have the form

$$\text{dense}[1, 1, 1] \times 1 - \text{pool} - \text{dense}[k, h, w] \times 1. \quad (30)$$

Here we use a  $1 \times 1$  convolution to halve the number of output channels, and then perform a spatial average pooling with kernel size 2 and stride 2, followed by a second dense layer. We denote these as  $\text{transition}[k, h, w]$ . We also use long skip connection between transition layers. The network we use is shown in Table 3.

## References

- Bernhard Burgeth, Stephan Didas, and Joachim Weickert. The bessel scale-space. In *Deep Structure, Singularities, and Computer Vision, First International Workshop, DSSCV 2005, Maastricht, The Netherlands, June 9-10, 2005, Revised Selected Papers*, pages 84–95, 2005a. doi: 10.1007/11577812\_8. URL [https://doi.org/10.1007/11577812\\_8](https://doi.org/10.1007/11577812_8).
- Bernhard Burgeth, Stephan Didas, and Joachim Weickert. Relativistic scale-spaces. In *Scale Space and PDE Methods in Computer Vision, 5th International Conference, Scale-Space 2005, Hofgeismar, Germany, April 7-9, 2005, Proceedings*, pages 1–12, 2005b. doi: 10.1007/11408031\_1. URL [https://doi.org/10.1007/11408031\\_1](https://doi.org/10.1007/11408031_1).
- Peter J Burt. Fast filter transform for image processing. *Computer graphics and image processing*, 16(1):20–51, 1981.
- James L Crowley, Olivier Riff, and Justus H Piater. Fast computation of characteristic scale using a half octave pyramid. In *International Conference on Scale-Space Theories in Computer Vision*, 2002.
- Remco Duits and Bernhard Burgeth. Scale spaces on lie groups. In *Scale Space and Variational Methods in Computer Vision, First International Conference, SSVM 2007, Ischia, Italy, May 30 - June 2, 2007, Proceedings*, pages 300–312, 2007. doi: 10.1007/978-3-540-72823-8\_26. URL [https://doi.org/10.1007/978-3-540-72823-8\\_26](https://doi.org/10.1007/978-3-540-72823-8_26).
- Remco Duits, Michael Felsberg, Luc Florack, and Bram Platel. alpha scale spaces on a bounded domain. In *Scale Space Methods in Computer Vision, 4th International Conference, Scale-Space 2003, Isle of Skye, UK, June 10-12, 2003, Proceedings*, pages 494–510, 2003. doi: 10.1007/3-540-44935-3\_34. URL [https://doi.org/10.1007/3-540-44935-3\\_34](https://doi.org/10.1007/3-540-44935-3_34).
- Remco Duits, Luc Florack, Jan de Graaf, and Bart M. ter Haar Romeny. On the axioms of scale space theory. *Journal of Mathematical Imaging and Vision*, 20(3):267–298, 2004. doi: 10.1023/B:JMIV.0000024043.96722.aa. URL <https://doi.org/10.1023/B:JMIV.0000024043.96722.aa>.
- Luc Florack, Bart M. ter Haar Romeny, Jan J. Koenderink, and Max A. Viergever. Scale and the differential structure of images. *Image Vision Comput.*, 10(6):376–388, 1992. doi: 10.1016/0262-8856(92)90024-W.

- 137 Luc Florack, Bart M. ter Haar Romeny, Jan J. Koenderink, and Max A. Viergever. Linear scale-space.  
138 *Journal of Mathematical Imaging and Vision*, 4(4):325–351, 1994. doi: 10.1007/BF01262401.  
139 URL <https://doi.org/10.1007/BF01262401>.
- 140 Kaiming He, Xiangyu Zhang, Shaoqing Ren, and Jian Sun. Deep residual learning for image  
141 recognition. In *2016 IEEE Conference on Computer Vision and Pattern Recognition, CVPR 2016,*  
142 *Las Vegas, NV, USA, June 27-30, 2016*, pages 770–778, 2016. doi: 10.1109/CVPR.2016.90.
- 143 Gao Huang, Zhuang Liu, Laurens van der Maaten, and Kilian Q. Weinberger. Densely connected  
144 convolutional networks. In *2017 IEEE Conference on Computer Vision and Pattern Recognition,*  
145 *CVPR 2017, Honolulu, HI, USA, July 21-26, 2017*, pages 2261–2269, 2017. doi: 10.1109/CVPR.  
146 2017.243.
- 147 Tony Lindeberg. Scale-space for discrete signals. *IEEE Trans. Pattern Anal. Mach. Intell.*, 12(3):  
148 234–254, 1990. doi: 10.1109/34.49051.
- 149 Tony Lindeberg. On the axiomatic foundations of linear scale-space. In *Gaussian Scale-Space*  
150 *Theory*, pages 75–97, 1997. doi: 10.1007/978-94-015-8802-7\_6.
- 151 Eric J. Pauwels, Luc J. Van Gool, Peter Fiddelaers, and Theo Moons. An extended class of scale-  
152 invariant and recursive scale space filters. *IEEE Trans. Pattern Anal. Mach. Intell.*, 17(7):691–701,  
153 1995. doi: 10.1109/34.391411.
- 154 Alfons H. Salden, Bart M. ter Haar Romeny, and Max A. Viergever. Linear scale-space theory  
155 from physical principles. *Journal of Mathematical Imaging and Vision*, 9(2):103–139, 1998. doi:  
156 10.1023/A:1008300826001. URL <https://doi.org/10.1023/A:1008300826001>.
- 157 Fisher Yu, Vladlen Koltun, and Thomas A. Funkhouser. Dilated residual networks. In *2017 IEEE*  
158 *Conference on Computer Vision and Pattern Recognition, CVPR 2017, Honolulu, HI, USA, July*  
159 *21-26, 2017*, pages 636–644, 2017. doi: 10.1109/CVPR.2017.75.
